# Supplementary material
Source: PubMed Central journal article supplement (PMC9272279)
Supplement: 10-1055-s-0041-1733973-s200411.pdf [file 10-1055-s-0041-1733973-s200411.pdf]

**Supplementary Table S1** Inclusion and exclusion criteria

| Category              | Inclusion criteria                          | Exclusion criteria                               |
|-----------------------|---------------------------------------------|--------------------------------------------------|
| Age                   | All ages                                    | No age restriction                               |
| Patient base          | Osteoradionecrosis of the median skull base | Osteoradionecrosis of the lateral the skull base |
| Treatment             | All surgical approaches                     | No surgical approach excluded                    |
| Study methodologies   | All study methodologies                     | No limitation                                    |
| Study population      | Human studies                               | Animal studies<br>Cadaver studies                |
| Geography             | All locations                               | No limitation                                    |
| Date of search        | January 1990–June 2000                      | NA                                               |
| Outcomes              | Disease progression<br>Mortality            | NA                                               |
| Publication languages | All languages                               | No limitation                                    |
| Publication type      | All publications types                      | No limitation                                    |

Abbreviation: NA, not applicable.

**Supplementary Table S2** Search criteria

| Database searched | Search terms                                                                       |
|-------------------|------------------------------------------------------------------------------------|
| PubMed/ Medline   | Skull base AND osteoradionecrosis                                                  |
| EMBASE            | “Skull base” AND (“bone necrosis”/exp OR “bone necrosis”) AND “radiation necrosis” |
| Cochrane library  | Skull base AND osteoradionecrosis                                                  |

**Supplementary Table S3** National Institutes of Health study quality overall assessment

| Study                       | Year | Overall score | Study                        | Year | Overall score |
|-----------------------------|------|---------------|------------------------------|------|---------------|
| Habib et al <sup>25</sup>   | 2020 | Good          | Hu <sup>38</sup>             | 2013 | Poor          |
| Daoudi et al <sup>23</sup>  | 2020 | Fair          | Raza <sup>47</sup>           | 2013 | Fair          |
| Ungar <sup>49</sup>         | 2020 | Good          | Wang <sup>53</sup>           | 2011 | Poor          |
| Vieira et al <sup>50</sup>  | 2020 | Fair          | King et al <sup>41</sup>     | 2010 | Fair          |
| Liu <sup>24</sup>           | 2019 | Good          | Kakarala et al <sup>40</sup> | 2010 | Fair          |
| Chapchay <sup>34</sup>      | 2019 | Fair          | Liang et al <sup>42</sup>    | 2009 | Good          |
| Hallak et al <sup>37</sup>  | 2019 | Fair          | Huang et al <sup>39</sup>    | 2006 | Good          |
| Vlantis <sup>51</sup>       | 2018 | Fair          | Wang <sup>52</sup>           | 2006 | Poor          |
| Huang <sup>22</sup>         | 2018 | Good          | Mut <sup>45</sup>            | 2005 | Fair          |
| London <sup>44</sup>        | 2018 | Fair          | Liu <sup>43</sup>            | 2004 | Poor          |
| Choi <sup>55</sup>          | 2017 | Fair          | Chen et al <sup>35</sup>     | 2004 | Poor          |
| Risso et al <sup>48</sup>   | 2016 | Fair          | Chang <sup>33</sup>          | 2000 | Good          |
| Adel and Chang <sup>3</sup> | 2016 | Fair          | Wu and Lee <sup>54</sup>     | 1999 | Poor          |
| Tan <sup>31</sup>           | 2015 | Fair          | Ness <sup>46</sup>           | 1996 | Poor          |
| Brand <sup>29</sup>         | 2015 | Poor          |                              |      |               |

Abbreviation: NIH, National Institute of Health.

**Supplementary Table S4** Study quality assessment for before-after studies with no control group

| Study                                                                                           | Habib et al <sup>25</sup> | Daoudi et al <sup>23</sup> | Liu <sup>24</sup> | Huan <sup>22</sup> | Liang et al <sup>42</sup> | Huang et al <sup>39</sup> | Chang <sup>33</sup> |
|-------------------------------------------------------------------------------------------------|---------------------------|----------------------------|-------------------|--------------------|---------------------------|---------------------------|---------------------|
| Objective clear?                                                                                | Y                         | Y                          | Y                 | Y                  | Y                         | Y                         | Y                   |
| Eligibility/selection criteria prespecified and clear?                                          | Y                         | Y                          | Y                 | Y                  | Y                         | Y                         | Y                   |
| Participants representative of intervention-eligible population?                                | Y                         | Y                          | Y                 | Y                  | Y                         | Y                         | Y                   |
| All eligible participants with prespecified entry criteria enrolled?                            | Y                         | Y                          | Y                 | Y                  | Y                         | Y                         | Y                   |
| Sample size sufficient?                                                                         | Y                         | N                          | Y                 | Y                  | Y                         | Y                         | N                   |
| Intervention clear and delivered consistently?                                                  | Y                         | N                          | Y                 | Y                  | N                         | Y                         | Y                   |
| Outcomes prespecified, clear, valid, reliable, and assessed consistently?                       | Y                         | N                          | Y                 | Y                  | Y                         | Y                         | Y                   |
| Outcome assessment blinded?                                                                     | N                         | N                          | N                 | N                  | N                         | N                         | N                   |
| Loss of follow-up 20% or less? Analysis includes this group?                                    | Y                         | Y                          | Y                 | Y                  | Y                         | Y                         | Y                   |
| Statistics measured outcomes before to after intervention? <i>p</i> -value?                     | Y                         | NA                         | Y                 | Y                  | NA                        | NA                        | NA                  |
| Outcomes measured multiple times before and after intervention? Interrupted time series design? | N                         | N                          | N                 | N                  | N                         | N                         | N                   |
| Overall score                                                                                   | Good                      | Fair                       | Good              | Good               | Good                      | Good                      | Good                |

Abbreviations: CD, cannot determine; N, no; NA, not applicable; NR, not reported; Y, yes.

**Supplementary Table S5** Study quality assessment for case series and case reports (1/3)

| Study                                            | Ungar <sup>49</sup> | Vieira et al <sup>50</sup> | Chapchay <sup>34</sup> | Hallak et al <sup>37</sup> | Vlantis <sup>51</sup> | London <sup>44</sup> | Choi <sup>55</sup> | Risso et al <sup>48</sup> |
|--------------------------------------------------|---------------------|----------------------------|------------------------|----------------------------|-----------------------|----------------------|--------------------|---------------------------|
| Objective clear?                                 | Y                   | Y                          | Y                      | Y                          | Y                     | Y                    | Y                  | Y                         |
| Population well described?                       | Y                   | Y                          | Y                      | Y                          | Y                     | Y                    | Y                  | Y                         |
| Cases consecutive?                               | ND                  | NA                         | NA                     | NA                         | ND                    | NA                   | ND                 | NA                        |
| Cases comparable?                                | Y                   | NA                         | NA                     | NA                         | Y                     | NA                   | Y                  | NA                        |
| Intervention clear?                              | Y                   | Y                          | Y                      | Y                          | Y                     | Y                    | Y                  | Y                         |
| Outcomes clear, valid, reliable, and consistent? | Y                   | N                          | NA                     | N                          | N                     | NA                   | N                  | N                         |
| Length of follow-up adequate?                    | Y                   | Y                          | Y                      | N                          | Y                     | Y                    | Y                  | N                         |
| Statistics well-described?                       | Y                   | NA                         | NA                     | NA                         | NA                    | NA                   | NA                 | NA                        |
| Results well-described?                          | Y                   | Y                          | Y                      | Y                          | Y                     | Y                    | Y                  | Y                         |
| Overall score                                    | Good                | Fair                       | Fair                   | Fair                       | Fair                  | Fair                 | Fair               | Fair                      |

Abbreviations: CD, cannot determine; N, no; NA, not applicable; NR, not reported; Y, yes.

**Supplementary Table S6** Study quality assessment for case series and case reports (2/3)

| Author                                           | Brand <sup>29</sup> | Hu <sup>38</sup> | Raza <sup>47</sup> | Wang <sup>53</sup> | King et al <sup>41</sup> | Kakarala et al <sup>40</sup> |
|--------------------------------------------------|---------------------|------------------|--------------------|--------------------|--------------------------|------------------------------|
| Objective clear?                                 | Y                   | Y                | Y                  | Y                  | Y                        | Y                            |
| Population well described?                       | Y                   | Y                | Y                  | Y                  | Y                        | Y                            |
| Cases consecutive?                               | NA                  | NA               | NA                 | NA                 | ND                       | NA                           |
| Cases comparable?                                | NA                  | NA               | NA                 | NA                 | Y                        | NA                           |
| Intervention clear?                              | Y                   | Y                | Y                  | N                  | N                        | Y                            |
| Outcomes clear, valid, reliable, and consistent? | N                   | N                | N                  | N                  | Y                        | N                            |
| Length of follow-up adequate?                    | N                   | N                | Y                  | N                  | N                        | Y                            |
| Statistics well-described?                       | NA                  | NA               | NA                 | NA                 | NA                       | NA                           |
| Results well-described?                          | N                   | N                | Y                  | N                  | Y                        | Y                            |
| Overall score                                    | Poor                | Poor             | Fair               | Poor               | Fair                     | Fair                         |

Abbreviations: CD, cannot determine; N, no; NA, not applicable; NR, not reported; Y, yes.

**Supplementary Table S7** Study quality assessment for case series and case reports (3/3)

| Criteria                                         | Wang <sup>52</sup> | Mut <sup>45</sup> | Liu <sup>43</sup> | Chen et al <sup>35</sup> | Wu and Lee <sup>54</sup> | Ness <sup>46</sup> |
|--------------------------------------------------|--------------------|-------------------|-------------------|--------------------------|--------------------------|--------------------|
| Objective clear?                                 | Y                  | Y                 | Y                 | Y                        | Y                        | Y                  |
| Population well described?                       | Y                  | Y                 | Y                 | Y                        | Y                        | Y                  |
| Cases consecutive?                               | NA                 | NA                | NA                | NA                       | NA                       | N                  |
| Cases comparable?                                | NA                 | NA                | NA                | NA                       | NA                       | Y                  |
| Intervention clear?                              | N                  | Y                 | N                 | Y                        | Y                        | Y                  |
| Outcomes clear, valid, reliable, and consistent? | N                  | N                 | N                 | N                        | N                        | N                  |
| Length of follow-up adequate?                    | N                  | N                 | N                 | N                        | N                        | Y                  |
| Statistics well-described?                       | NA                 | NA                | NA                | NA                       | NA                       | NA                 |
| Results well-described?                          | N                  | Y                 | N                 | N                        | N                        | Y                  |
| Overall score                                    | Poor               | Fair              | Poor              | Poor                     | Poor                     | Poor               |

Abbreviations: CD, cannot determine; N, no; NA, not applicable; NR, not reported; Y, yes.

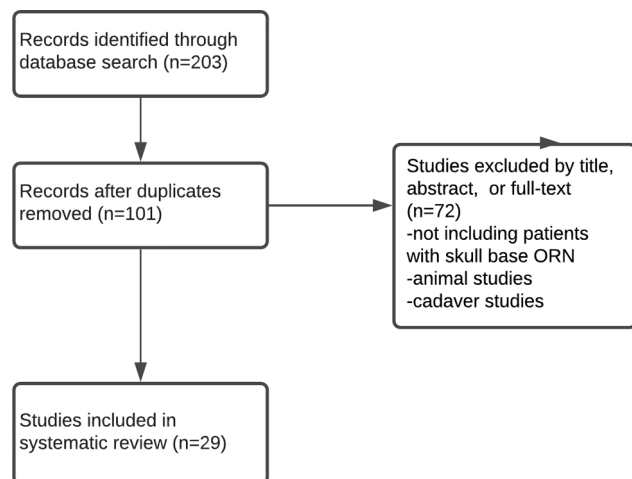

**Supplementary Fig. S1** PRISMA flow chart of study selection process. A total of 203 studies were identified from literature search; 102 studies remained after removal of duplicate studies; 101 articles were excluded after viewing title, abstract, or full-text; and 29 studies were included in the final analysis.

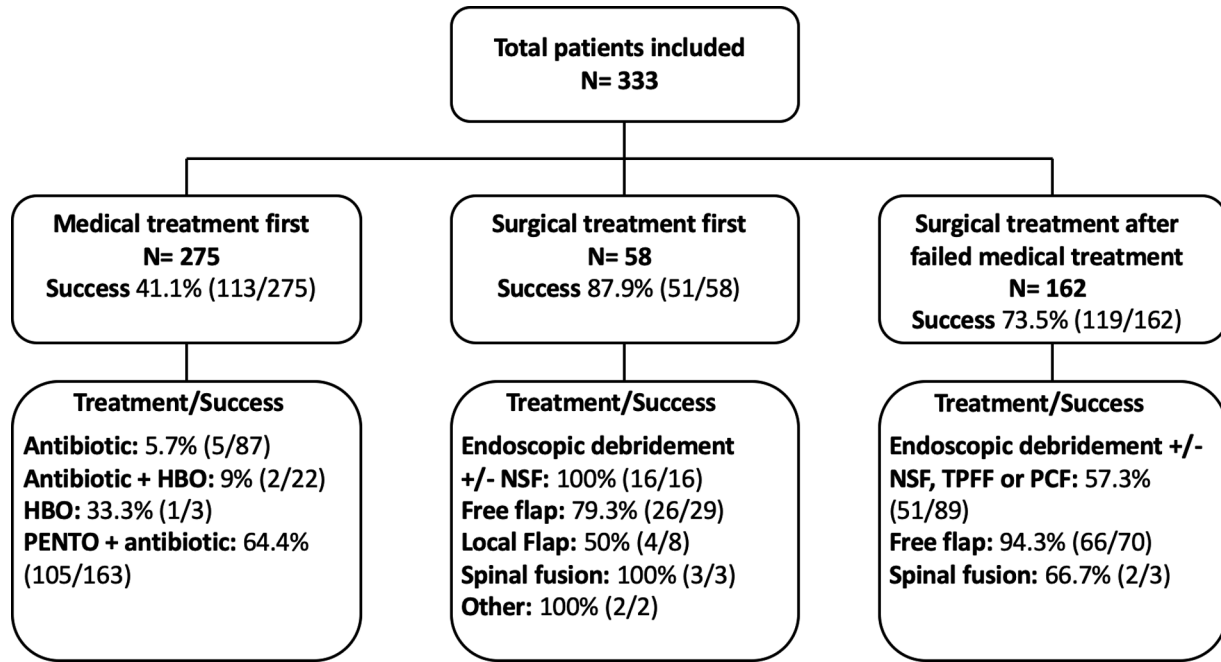

Supplementary Fig. S2 Flow chart showing the different treatment arms for the patients included in the analysis. Outcome for each arm is included. HBO, hyperbaric oxygen; PENTO, pentoxifylline-tocopherol; NSF, nasoseptal flap; TPFF, temporoparietal fascia flap; PCF, pericranial flap.
